# Supplementary material for: One-pot solvothermal method to synthesize platinum/W18O49 ultrafine nanowires and their catalytic performance
Source: Royal Society of Chemistry journal article supplement (doi:10.1039/c1jm15726d), 2012-01-01
Supplement: c1jm15726d.pdf [file c1jm15726d.pdf]

## Supporting Information

# One-pot solvothermal method to synthesize Platinum/W<sub>18</sub>O<sub>49</sub> ultrafine nanowires and their catalytic performance

Hongye Zhang, Changliang Huang, Ranting Tao, Yanfei Zhao, Sha Chen, Zhenyu Sun, Zhimin Liu\*

Beijing National Laboratory of Molecular Science, Institute of Chemistry, The Chinese Academy of Sciences, Beijing 100190, China. E-mail: [liuzm@iccas.ac.cn](mailto:liuzm@iccas.ac.cn)

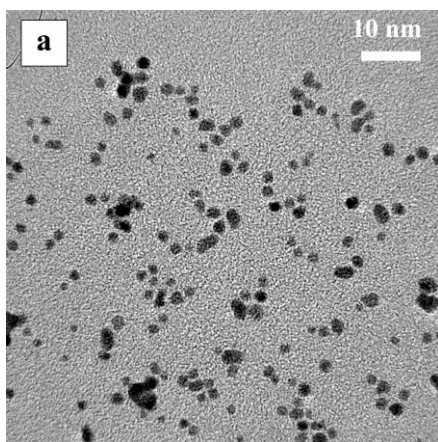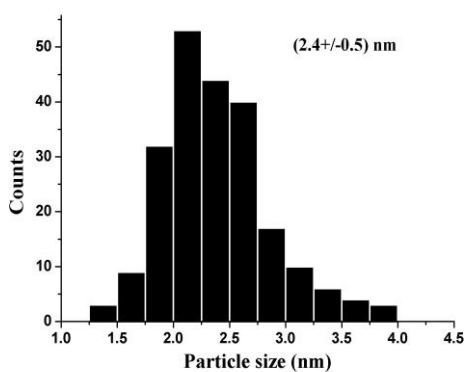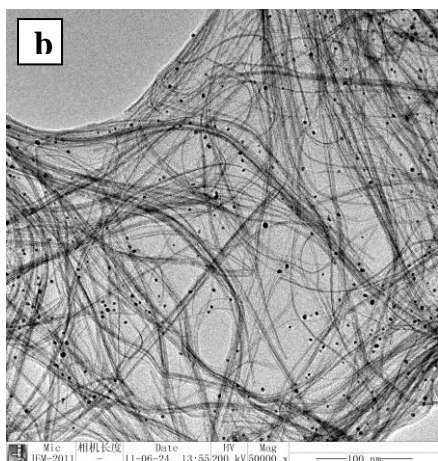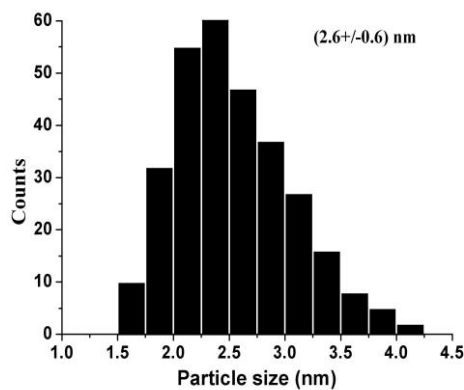

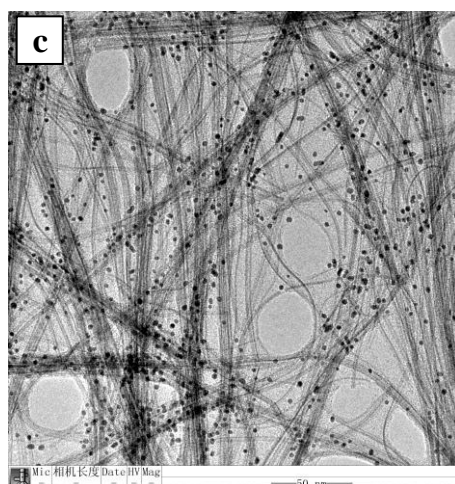

**Figure S1.** TEM images together with the Pt particle size distribution diagrams: a) PVP-stabilized Pt nanoparticles; b) Pt/W<sub>18</sub>O<sub>49</sub> sample prepared with  $R_{p/w}=3$ . The corresponding particle size distribution obtained by counting more than 200 particles in the TEM images; c) Pt/W<sub>18</sub>O<sub>49</sub> sample prepared with  $R_{p/w}=6$ , Pt theoretical loading = 4 wt%.

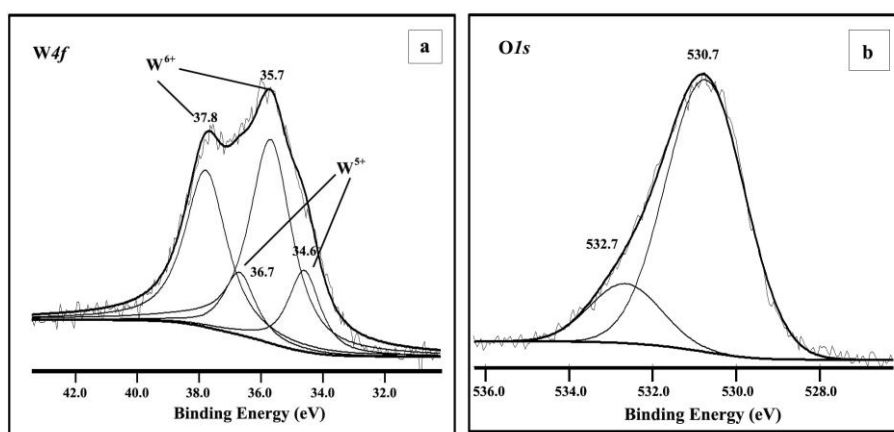

**Figure S2.** W4f- (a) and O1s-level (b) XPS spectra of the Pt/W<sub>18</sub>O<sub>49</sub> sample prepared with  $R_{p/w}=3$ . The spectrum of O1s-level can be decomposed into separate peaks. The peak with binding energy at 530.7 eV corresponded to O1s-levels of oxygen atoms O<sup>2-</sup> in the lattice of W<sub>18</sub>O<sub>49</sub>, and the other peak with weak intensity at 532.7 eV was assigned to the absorbed water molecules on the free oxide surface.

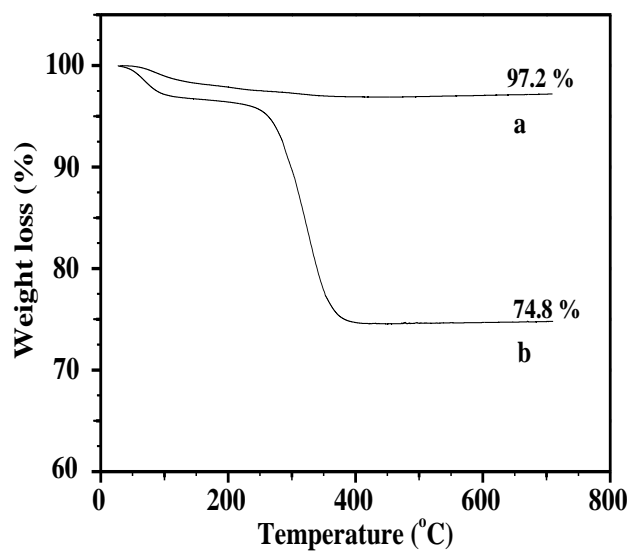

**Figure S3.** TGA diagrams of: a) pure  $W_{18}O_{49}$ , and b)  $Pt/W_{18}O_{49}$  sample prepared with  $R_{p/w}=3$ .

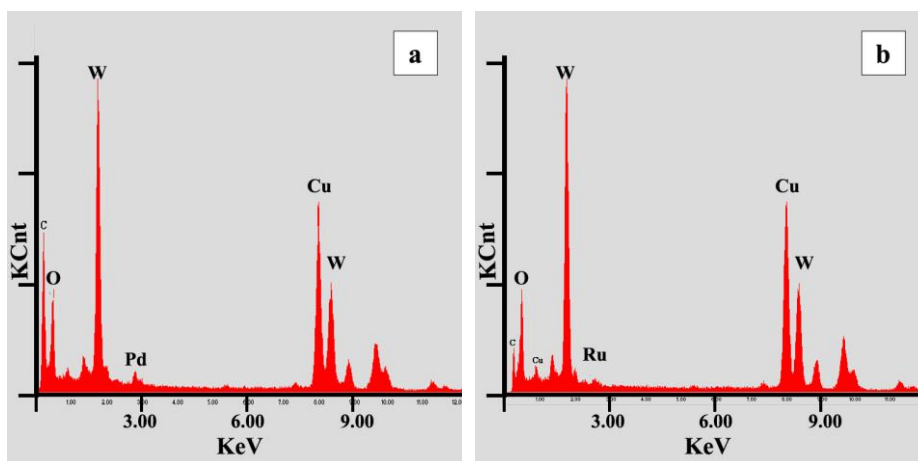

**Figure S4:** The corresponding EDX patterns of  $Pd/W_{18}O_{49}$  (a) and  $Ru/W_{18}O_{49}$  nanocomposites (b).
